# Supplementary material for: Quality, Reliability, and Engagement of Lumbar Disc Herniation Videos Across Major Short-Video Platforms: A Cross-Platform Analysis
Source: Research Square preprint supplement (doi:10.21203/rs.3.rs-8780255/v1), 2026-02-19
Supplement: Supplementary file 1 [file f5fed7bcf09395745cb5eff4.docx]

Supplementary Table 1-1 The DISCERN Instrument

| Section 1: Is the publication reliable? | |  |
| --- | --- | --- |
| Q1 | Are the aims clear? | |
| Q2 | Does it achieve its aims? | |
| Q3 | Is it relevant? | |
| Q4 | Is it clear what sources of information were used to compile the publication (other than the author or producer)? | |
| Q5 | Is it clear when the information used or reported in the publication was produced? | |
| Q6 | Is it balanced and unbiased? | |
| Q7 | Does it provide details of additional sources of support and information? | |
| Q8 | Does it refer to areas of uncertainty? | |

Supplementary Table 1-2 The DISCERN Instrument

| Section 2: How good is the quality of information on treatment choices? | |
| --- | --- |
| Q9 | Does it describe how each treatment works? |
| Q10 | Does it describe the benefits of each treatment? |
| Q11 | Does it describe the risks of each treatment? |
| Q12 | Does it describe what would happen if no treatment is used? |
| Q13 | Does it describe how the treatment choices affect overall quality of life? |
| Q14 | Does it describe whether the treatment choices have any effect on symptoms? |
| Q15 | Does it provide support for shared decision-making? |
| Q16 | Does it describe how each treatment works? |

Supplementary Table 1-3 The DISCERN Instrument

| Section 3: Overall rating | |
| --- | --- |
| Q16 | Does it describe how each treatment works? |

Supplementary Table 2 The Journal of American Medical Association (JAMA) benchmark criteria.

| Criteria | Description |
| --- | --- |
| Authorship | Authors and contributors, their afliations, and relevant credentials should be provided. |
| Attribution | References and sources for all content should be listed clearly, and all relevant copyright information noted. |
| Currency | Website ownership should be prominently and fully disclosed, as should any sponsorship, advertising, underwriting, commercialfunding arrangements or support, or potential conflicts of interest. |
| Disclosure | Dates that content was posted and updated should be indicated. |

Supplementary Table 3 5-point Global Quality Scale (GQS).

| GQS | Description |
| --- | --- |
| 1 | Poor quality; poor flow of the site; most information missing; not at all useful for patients |
| 2 | Generally poor quality and poor flow, some information listed but many important topics missing, of very limited use to patients |
| 3 | Moderate quality, suboptimal flow, some important information is adequately discussed but others poorly discussed; somewhatuseful for patients |
| 4 | Good quality and generally good flow, most of the relevant information is listed, but some topics not covered; useful for patients |
| 5 | Excellent quality and excellent flow, very useful for patients |

Supplementary Table 4 Association Between JAMA Q1 Compliance and Video Performance Metrics​

|  | JAMA Q1 (Y) | JAMA Q1 (N) | P |
| --- | --- | --- | --- |
| Like | 2646(11451) | 2261(7630) | 0.227 |
| Comment | 224.5(820) | 218(1337) | 0.894 |
| Share | 730(5171) | 851(3095) | 0.947 |
| Video duration | 172.5(563) | 159(750) | 0.506 |
| Video published time | 87(173) | 158(477) | <0.001** |
| GQS | 3(1) | 2(2) | 0.066 |
| Sum Q1-Q8 | 10(4) | 11(4) | 0.791 |
| Sum Q9-Q15 | 10(3) | 10(3) | 0.086 |
| Q16 | 2(1) | 2(2) | 0.699 |

Data are presented as *x* ± s or median (IQR).

*: P < 0.05 (two-tailed), theoretically represents a statistically significant difference between the 2 groups.

**: P < 0.01 (two-tailed), represents a statistically significant difference between the 2 groups

Supplementary Table 5 Impact of JAMA Q2 Compliance on Video Characteristics and Content Quality​

|  | JAMA Q2 (Y) | JAMA Q2 (N) | P |
| --- | --- | --- | --- |
| Like | 1514(16377) | 2594.5(8668) | 0.781 |
| Comment | 183(2573) | 231.5(888) | 0.804 |
| Share | 715(6920) | 804.5(3618) | 0.88 |
| Video duration | 616.97±556.988 | 139(519) | 0.07 |
| Video published time | 280(780) | 91.5(196) | <0.001** |
| GQS | 3(2) | 3(2) | 0.002** |
| Sum Q1-Q8 | 13(5) | 10(3) | <0.001** |
| Sum Q9-Q15 | 11(4) | 10(3) | 0.069 |
| Q16 | 2(1) | 2(1) | <0.001** |

Data are presented as *x* ± s or median (IQR).

*: P < 0.05 (two-tailed), theoretically represents a statistically significant difference between the 2 groups

**: P < 0.01 (two-tailed), represents a statistically significant difference between the 2 groups
